# Supplementary material for: Macrophage Migration Inhibitory Factor in Psoroptes ovis: Molecular Characterization and Potential Role in Eosinophil Accumulation of Skin in Rabbit and Its Implication in the Host–Parasite Interaction
Source: MDPI journal article supplement (doi:10.3390/ijms24065985), 2023-03-22

## Supplement

**Table S1 : Primer information of genes from human and rabbit**

| Species | Genes (GenBank No.)                   | Primers                                                      | Size (bp) |
|---------|---------------------------------------|--------------------------------------------------------------|-----------|
| Human   | CCL5 (NM_001278736.2)                 | F: ATTTGCCTGTTTCTGCTTGCTCTTG<br>R: AACTGCTGCTGTGTGGTAGAATCTG | 106       |
|         | IL-5 (NM_000879.3)                    | F: GAGCTGCCTACGTGTATGCCATC<br>R: ATGAGTAGAAAGCAGTGCCAAGGTC   | 83        |
|         | IL-4 (BC067514.1)                     | F: ACAGCAGTTCCACAGGCACAAG<br>R: CGTACTCTGGTTGGCTTCCTTCAC     | 115       |
|         | IL-13 (BC096140.3)                    | F: CAGAGGATGCTGAGCGGATT<br>R: ACTGGGCCACCTCGATTTTG           | 94        |
|         | IL-3 (NM_000588.4)                    | F: CCTGCCGATCCAAACATGAG<br>R: GTCTGGGTCATGGGAGCTTG           | 89        |
|         | CCL11 (NM_002986.3)                   | F: TCCCAACCACCTGCTGCTTTAAC<br>R: ACATTTGCCACTGGTGATTCTCCTG   | 89        |
|         | YWHAZ (NM_001135702.2)                | F: ACTTTTGGTACATTGTGGCTTCAA<br>R: CCGCCAGGACAAACCAGTAT       | 94        |
|         | CCL5 (XM_017349037.1)                 | F: TGCCTCGACAACAGGAAACC<br>R: ACCCCCATAGGAACCCATA            | 129       |
|         | IL-5 (XM_002710201.3)                 | F: GTCGAAGGCAAACACTGCAC<br>R: GCTCATGCGGATTTCTGTGG           | 112       |
|         | IL-4 (NM_001163177.1)                 | F: GCGACATCATCCTACCCGAA<br>R: CTCGGTTGTGTTCTTGGGGA           | 116       |
|         | IL-13 (XM_002710092.3)                | F: CCTTGGCAGCCTCGTATCC<br>R: GAGTGGAGCCTTCTGGTTGT            | 103       |
|         | CCL11 (NM_001322432.1)                | F: CCCACCATCTGGCTTCCTTA<br>R: TGGGATGTGGAGAGTGGAGA           | 89        |
|         | SELP (selectin P)<br>(NM_001361473.1) | F: GGTAATGGCTGGAACCCTCC<br>R: AGGGATGGGGTCAAATGCAG           | 136       |
|         | ICAM-1 (AB128157.1)                   | F: TCAGGACCCTAGTCGGAAGA<br>R: ACAAGGGCTGTCACTGTTCAA          | 127       |
| Rabbit  | $\beta$ -actin (NM001101683.1)        | F: GGCATGGAGTCGTGTGGCATC<br>R: CGTGTTGGCGTACAGGTCCTTG        | 90        |

**Figure S1. Effects of rPsoMIF on the cell viability of PBMC.** ns  $P > 0.05$ , \* $P < 0.05$ .

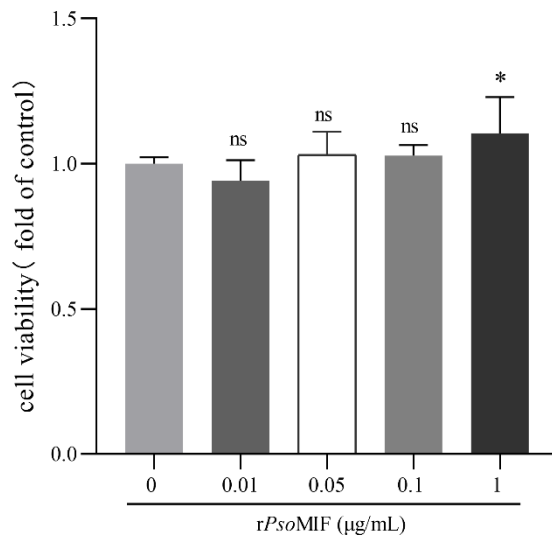

**Figure S2. Effects of rPsoMIF on the cell viability of HaCaT.** (A) Different concentrations of rPsoMIF; (B) Different exposure times. ns  $P > 0.05$ , \* $P < 0.05$ , \*\* $P < 0.001$ .

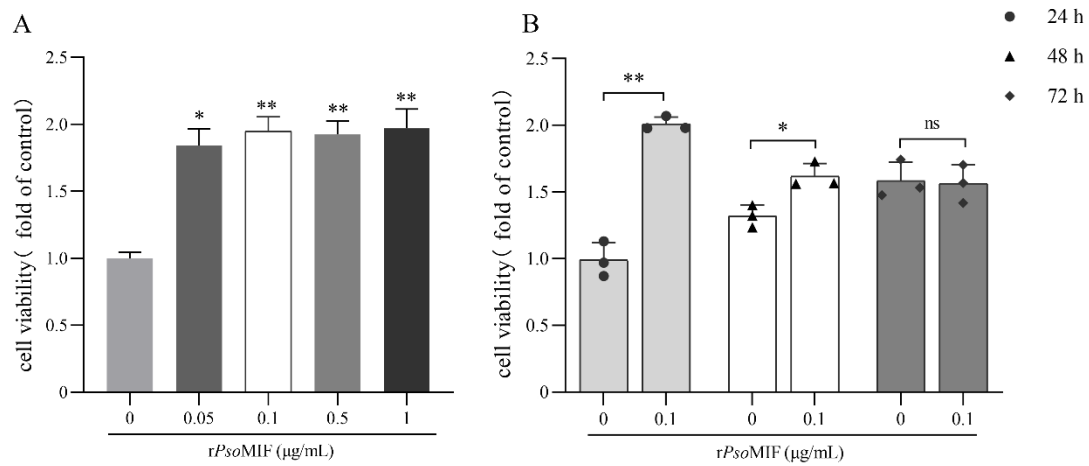

Supplement: s1 [file s1]
